1           **Integrated Low-Energy and Low Carbon Shortcut Nitrogen removal with Biological**  
2           **Phosphorus Removal for Sustainable Mainstream Wastewater Treatment**

3

4           Paul Roots<sup>a</sup>, Fabrizio Sabba<sup>a</sup>, Alex F. Rosenthal<sup>b</sup>, Yubo Wang<sup>a</sup>, Quan Yuan<sup>c</sup>, Leiv Rieger<sup>b</sup>,  
5           Fenghua Yang<sup>d</sup>, Joseph A. Kozak<sup>d</sup>, Heng Zhang<sup>d</sup>, George F. Wells<sup>a\*</sup>

6

7           <sup>a</sup>Department of Civil and Environmental Engineering, Northwestern University, 2145 Sheridan  
8           Road, Evanston, IL, 60208, USA

9           <sup>b</sup>inCTRL Solutions, Inc., Dundas, Ontario, Canada

10          <sup>c</sup>Tsinghua University, Haidian District, Beijing, China

11          <sup>d</sup>Metropolitan Water Reclamation District of Greater Chicago, 6001 W Pershing Road, Chicago,  
12          IL, 60804, USA

13

14          \*Corresponding Author: George Wells. Phone: (847) 491-8794. Email:  
15          george.wells@northwestern.edu

## 16 **Abstract**

17 While enhanced biological phosphorus removal (EBPR) is widely utilized for phosphorus (P)  
18 removal from wastewater, understanding of efficient process alternatives that allow combined  
19 biological P removal and shortcut nitrogen (N) removal, such as nitrification-denitrification, is limited.  
20 Here, we demonstrate efficient and reliable combined total N, P, and chemical oxygen demand  
21 removal (70%, 83%, and 81%, respectively) in a sequencing batch reactor (SBR) treating real  
22 mainstream wastewater (primary effluent) at 20°C. Anaerobic – aerobic cycling (with intermittent  
23 oxic/anoxic periods during aeration) was used to achieve consistent removal rates, nitrite oxidizing  
24 organism (NOO) suppression, and high effluent quality. Importantly, high resolution process  
25 monitoring coupled to *ex situ* batch activity assays demonstrated that robust biological P removal  
26 was coupled to energy and carbon efficient nitrification-denitrification, not simultaneous nitrification-  
27 denitrification, for the last >400 days of 531 total days of operation. Nitrous oxide emissions of  
28 2.2% relative to the influent TKN (or 5.2% relative to total inorganic nitrogen removal) were  
29 similar to those measured in other shortcut N bioprocesses. No exogenous chemicals were needed  
30 to achieve consistent process stability and high removal rates in the face of frequent wet weather  
31 flows and highly variable influent concentrations. Process modeling reproduced the performance  
32 observed in the SBR and confirmed that nitrite drawdown via denitrification contributed to  
33 suppression of NOO activity.

## 34 **Keywords**

35 Nitrification-denitrification, enhanced biological phosphorus removal (EBPR), polyphosphate  
36 accumulating organisms (PAO), biological nutrient removal (BNR), NOO out-competition,  
37 nitrite oxidizing bacteria (NOB)

38

## 39 1. Introduction

40 Nitrogen (N) and phosphorus (P) are key limiting nutrients in surface waters, and their  
41 removal from wastewater is becoming increasingly important due to widespread eutrophication in  
42 both marine and lacustrine environments. While denitrification with exogenous carbon addition to  
43 remove N as well as chemical precipitation to remove P are well-established methods to meet  
44 nutrient discharge limits, utilities are seeking more efficient and cost-effective methods to meet  
45 their permits. Enhanced biological P removal (EBPR) is increasingly implemented as an  
46 economical alternative to chemical P precipitation, and emerging innovations in shortcut N  
47 removal processes, including nitrification coupled to heterotrophic denitrification via out-competition  
48 of nitrite oxidizing organisms (NOO) (Corominas et al., 2010), offer a route to low-energy, low-  
49 carbon biological N removal<sup>2</sup>. However, the drivers that select for NOO out-competition in  
50 shortcut N removal processes and their impact on biological P removal are little understood.

51 While several studies have proposed 2-stage systems with separate sludge for N and P  
52 removal<sup>3-5</sup>, single sludge systems simplify operations and maintenance and can reduce both  
53 capital and ongoing costs over 2-stage systems. A limited number of lab-scale studies have used  
54 single-sludge systems to incorporate shortcut N removal with P removal from synthetic wastewater  
55 feed (Lee et al., 2001; Tsuneda et al., 2006; and Zeng et al., 2003a). Given that chemical oxygen  
56 demand (COD) can be limiting in nutrient removal systems, it is important to note that all three of  
57 the referenced studies used readily biodegradable acetate in the synthetic feed as their primary  
58 carbon source in 10:1 g acetate-COD:gN and 27:1 g acetate-COD:gP ratios or higher. While  
59 promising proof of concepts, use of synthetic feed at such high VFA:N and VFA:P ratios is not  
60 representative of the dynamics in N, P, and COD composition commonly found in real wastewater.

61        Investigations of combined shortcut N and P removal from real wastewater without exogenous  
62 carbon or chemical addition for P precipitation are limited to one lab-scale reactor <sup>9</sup> and two full  
63 scale processes <sup>10,11</sup>, but all three had average wastewater temperatures between 26 and 30 °C.  
64 Such elevated temperatures confer a significant advantage to ammonia oxidizing organisms (AOO,  
65 which can include both ammonia oxidizing bacteria and archaea) over NOO, thereby greatly  
66 facilitating NOO out-competition <sup>12</sup>, but are not representative of conditions found in WWTPs in  
67 temperate regions. In the lab-scale reactor cited above, for instance, Zeng et al. (2014) <sup>9</sup> lost NOO  
68 out-selection when the wastewater temperature dropped below 23 °C as winter approached.  
69 Research into combined shortcut N and EBPR processes with real wastewater at moderate  
70 temperatures (i.e. ≤ 20 °C), where NOO suppression is significantly more challenging <sup>13</sup>, is  
71 currently lacking. Intermittent aeration is one promising strategy for NOO suppression at moderate  
72 temperatures. Explanations for its efficacy range from a metabolic lag phase of *Nitrospira* NOO  
73 compared to AOO upon exposure to oxygen <sup>14</sup> to transient exposure to free ammonia due to pH  
74 shifts in biofilms <sup>15</sup>, as free ammonia has a greater inhibitory effect on NOO than AOO <sup>16,17</sup>.  
75 However, the mechanism and efficacy of intermittent aeration for NOO suppression at moderate  
76 temperatures, with or without integration of biological P removal, is currently not well understood.

77        The propensity for shortcut N removal systems to produce nitrous oxide (N<sub>2</sub>O), a potent  
78 greenhouse gas, is little understood, though reports suggest that N<sub>2</sub>O production may exceed that  
79 of conventional N removal biotechnologies <sup>18-21</sup>. For example, in Zeng et al., (2003a), N<sub>2</sub>O  
80 production exceeded N<sub>2</sub> production from a lab-scale nitrification-denitrification process by more than  
81 3-fold. However, none of the above studies using real wastewater <sup>9-11</sup> measured N<sub>2</sub>O emissions.  
82 Therefore, N<sub>2</sub>O measurements on shortcut N removal systems integrated with biological P removal

83 from real wastewater are of interest to accurately assess their net impact on greenhouse gas  
84 emissions.

85 Here, we demonstrate efficient and reliable combined shortcut N, P, and COD removal in a  
86 sequencing batch reactor (SBR) treating real mainstream wastewater (primary effluent) at 20°C.  
87 In contrast to the synthetic studies cited above, the primary effluent used here as influent contained  
88 average ratios of 1:1 gVFA-COD:gTKN and 8.2:1 gVFA-COD:gTP, comprising a challenging  
89 environment for total nutrient removal. Importantly, EBPR was coupled to nitrification-denitrification  
90 for energy and carbon-efficient N removal. A simple kinetic explanation for the out-competition  
91 of NOO via intermittent aeration and SRT control was illustrated via batch tests and process  
92 modeling. No exogenous chemicals were needed to achieve consistent process stability and high  
93 removal rates in the face of frequent rain events and highly variable influent concentrations.

94

## 95 2. Materials and Methods

### 96 2.1 Reactor inoculation and operation

97 A 56-L reactor was seeded with activated sludge biomass from another pilot EBPR bioreactor  
98 (grown on the same wastewater) on June 15, 2017 (day 0 of reactor operation) and fed primary  
99 settling effluent from the Terrance J. O'Brien WRP in Skokie, IL for 531 days. Online sensors  
100 included  $\text{NH}_4^+$ , DO, pH and oxidation-reduction potential (ORP) (s::can, Vienna, Austria). The  
101 reactor was operated with code-based Programmable Logic Control (PLC) (Ignition SCADA  
102 software by Inductive Automation, Fulsom, CA, USA, and TwinCAT PLC software by Beckhoff,  
103 Verl, Germany) as a sequencing batch reactor (SBR) with cycle times detailed in Table 1. An  
104 anaerobic react period followed by an intermittently aerated period was chosen with the intent to  
105 select for integrated biological P removal and nitrification/denitrification via suppression of NOO  
106 activity. The reactor was temperature-controlled to target 20°C (actual temperature =  $19.8 \pm 1.0^\circ\text{C}$ )  
107 via a heat exchange loop to evaluate performance at moderate temperatures. The pH was not  
108 controlled and varied between 7.0 and 7.8.  $\text{NH}_4^+$  sensor-based control was used to control aerobic  
109 react length, as detailed in Table 1 and in the Supporting Information. Because react length varied  
110 with influent  $\text{NH}_4^+$  concentration (due to  $\text{NH}_4^+$  sensor-based control), the SBR loading rate  
111 followed that of the full-scale plant, i.e. with shortened SBR cycles and increased flow during wet-  
112 weather events. The process timeline is split into 2 phases to simplify reporting: Phase 1 (days 0 -  
113 246) and Phase 2 (days 247 – 531), the latter of which represents lower target effluent N  
114 concentrations and better N-removal performance. Details on intermittent aeration control can be  
115 found in the Supporting Information.

116 SRT was controlled via timed mixed liquor wasting after the aerated react phase, and solids  
117 losses in the effluent were included in the dynamic SRT calculation, following the methodology

118 of<sup>22</sup>. Using an operational definition of “aerobic” as  $> 0.2 \text{ mgO}_2/\text{L}$ , an analysis of 4 cycles from  
119 Phase 2 showed that an average 48% of the time within the intermittently aerated react period is  
120 aerobic. See the Supporting Information for details regarding SRT control and calculations.

121 Composite sampling as summarized in Table 2 was initiated on day 27 after an initialization  
122 period to allow the accumulation of AOO as measured by ammonia oxidation activity. Beginning  
123 on day 114 and to the end of the study, influent COD fractionation analysis was conducted once  
124 per week with the following definitions<sup>23</sup>:

- 125 • Particulate COD = Total COD – 1.2- $\mu\text{m}$  filtered COD
- 126 • Colloidal COD = 1.2- $\mu\text{m}$  filtered COD – floc-filtered COD
- 127 • Soluble COD (not including VFAs) = floc-filtered COD – VFA
- 128 • VFA COD = VFA

129 Floc-filtered COD was measured as described in Mamais et al. (1993) and total COD, filtered  
130 COD and VFAs were analyzed per Standard Methods<sup>25</sup>. On average, the total COD and VFA to  
131 nutrient ratios of the influent were (Table S1):

- 132 • 8.3:1 g total COD:g TKN
- 133 • 1:1 g VFA-COD:g TKN
- 134 • 67:1 g totalCOD:g totalP
- 135 • 8.2:1 g VFA-COD:g totalP
- 136

## 137 **2.2 Batch activity assays**

### 138 **2.2.1 In-cycle batch activity assays**

139 Seventeen in-cycle batch activity assays were conducted throughout the study to monitor *in*  
140 *situ* dynamics of  $\text{NH}_4^+$ ,  $\text{NO}_2^-$ ,  $\text{NO}_3^-$ ,  $\text{PO}_4^{3-}$  (all tests), readily biodegradable COD (rbCOD - two  
141 tests) and volatile fatty acids (VFAs – one test) via Standard Methods<sup>25</sup> and Mamais et al., 1993  
142 for rbCOD. Samples were taken every 15 – 45 minutes for a full SBR cycle, except in the case of  
143 two high-frequency tests, in which samples were taken every one to two minutes for 40 minutes

144 in the aerated portion of the cycle to investigate high time resolution nutrient dynamics during  
145 intermittent aeration.

146



## 147 2.2.2 *Ex situ* batch activity assays

148 *Ex situ* maximum batch activity assays for AOO and NOO were performed as previously  
149 described<sup>26,27</sup>. *Ex situ* activity assays were also employed to quantify biological P uptake of  
150 polyphosphate accumulating organisms (PAOs) under aerobic and denitrifying conditions.  
151 Relative P-uptake rates via different electron acceptors under typical in-reactor conditions was  
152 desired (as opposed to maximum P-uptake rates), so external carbon was not added. 250-mL  
153 aliquots of mixed liquor were removed from the reactor following the anaerobic phase (i.e. after P  
154 release and VFA uptake) and placed in air-tight 250-mL serum bottles. The sealed bottles were  
155 injected with sodium nitrite or potassium nitrate stock solutions to approximately 9 mgN/L of NO<sub>2</sub><sup>-</sup>  
156 or NO<sub>3</sub><sup>-</sup> for the anoxic (denitrifying) uptake tests or opened and bubbled with air through an  
157 aquarium diffusor stone for aerobic tests. A replicate for the aerobic test was provided by the 56-  
158 L reactor itself, which was also aerated continuously (with a resulting DO concentration of 2 mg/L)  
159 and sampled in parallel with the aerated serum bottle. A control assay utilized biomass with no  
160 electron acceptors (O<sub>2</sub>, NO<sub>3</sub><sup>-</sup>, or NO<sub>2</sub><sup>-</sup>) provided. Serum bottles were mixed by a Thermo Scientific  
161 MaxQ 2000 shaker table (Waltham, MA) at 150 RPM and at ambient temperature near 20°C. P  
162 uptake was quantified via a least squares regression of the PO<sub>4</sub><sup>3-</sup> measurement from 3 – 5 samples  
163 taken every 20 minutes and normalized to the reactor VSS. The results represent the average ±  
164 standard deviation of three total replicates for each electron acceptor from days 237 and 286.

165

### 166 2.2.3 In-cycle batch activity assays for quantification of N<sub>2</sub>O emissions

167 N<sub>2</sub>O emissions from the reactor were estimated during Phase 2 by measuring the aqueous N<sub>2</sub>O  
168 concentration over 8 separate cycles from days 414 to 531 with a Unisense N<sub>2</sub>O Wastewater Sensor  
169 (Aarhus, Denmark). N<sub>2</sub>O emissions were calculated from the aqueous concentration following  
170 Domingo-Félez et al. (2014), after measuring the N<sub>2</sub>O stripping rate during aeration with mixing  
171 and during mixing alone. NH<sub>4</sub><sup>+</sup>, NO<sub>2</sub><sup>-</sup> and NO<sub>3</sub><sup>-</sup> were measured concurrently at the beginning and  
172 end of cycles<sup>25</sup> to calculate TIN removal. N<sub>2</sub>O emissions were then quantified relative to TIN  
173 removal and the TKN load for each of the eight cycles.

### 174 2.3 Process Modeling

175 To evaluate mechanisms of NOO suppression and the balance between aerobic PAO and  
176 denitrifying PAO (DPAO) activity, the SIMBA#3.0.0 wastewater process modeling software (ifak  
177 technology + service, Karlsruhe, Germany) was used to simulate performance of the reactor during  
178 Phase 2 of operation. The inCTRL activated sludge model (ASM) matrix, based on Barker and  
179 Dold (1997) with the addition of two-step nitrification-denitrification, methanotrophs, and other  
180 extensions, was utilized without adjustment of kinetic or stoichiometric parameters. Default  
181 Monod half-saturation constants of particular relevance to this study include oxygen affinity of  
182 AOO ( $K_{O_2,AOO} = 0.25$  mgO<sub>2</sub>/L) and NOO ( $K_{O_2,NOO} = 0.15$  mgO<sub>2</sub>/L) and substrate affinity of  
183 AOO ( $K_{NH_x,AOO} = 0.7$  mgNH<sub>x</sub>-N/L; NH<sub>x</sub> = NH<sub>4</sub><sup>+</sup> + NH<sub>3</sub>) and NOO ( $K_{NO_2,NOO} = 0.1$  mgNO<sub>2</sub><sup>-</sup>-  
184 N/L); further parameters can be found in the Supporting Information. SBR control of the reactor  
185 was simulated directly using a petri net approach, with sequence control shown as green blocks in  
186 Figure S1. To avoid rounding errors and to improve simulation speed, the reactor was modeled  
187 with a 56 m<sup>3</sup> working volume as opposed to 56 L. As in the reactor, the modeled anoxic period  
188 was fixed at 45 minutes and the aerobic period ended when soluble NH<sub>x</sub> (i.e. NH<sub>4</sub><sup>+</sup> + NH<sub>3</sub>, which

189 is approximately equal to  $\text{NH}_4^+$  at the pH values encountered of 7.0 – 7.8) was < 2 mgN/L. Modeled  
190 intermittent aeration during the aerobic period was controlled as described in the Supporting  
191 Information, though a slightly longer “anoxic” timer of 3 min 45 seconds in the model was used  
192 (vs. 0 – 3 minutes in the actual SBR) to account for the DO sensor delay in the actual SBR.  
193 Modeled mixed liquor wasting was adjusted until the calculated model SRT (which  
194 included effluent solids) matched the SRT of the reactor during Phase 2. 5/8 volume decant was  
195 performed at the end of the cycle and average primary effluent (reactor influent) values from Phase  
196 2 were used as model influent. The initialization procedure involved running the model for 150  
197 days to achieve quasi steady-state conditions. Modeled specific growth rates for AOO, NOO, and  
198 PAOs were quantified throughout the SBR cycles with rate equations and parameter values from  
199 the SIMBA# inCTRL ASM matrix.

$$\begin{aligned} 200 \quad & \mu_{AOO} = \text{net specific growth rate of AOO } (d^{-1}) \\ 201 \quad & \mu_{NOO} = \text{net specific growth rate of NOO } (d^{-1}) \end{aligned}$$

202 The washout SRT for NOO was calculated from  $\mu_{NOO}$  as detailed in the Supporting  
203 Information.

204 Modeled PAO growth rates as discussed in this paper include growth on PHA associated  
205 with P uptake but do not include decay or PAO growth on PHA where  $\text{PO}_4^{3-}$  is limiting. Also, the  
206 SIMBA# inCTRL ASM matrix considers only a single PAO population with an anoxic growth  
207 factor ( $\eta_{anox,PAO} = 0.33$ ) in the DPAO rate equations to estimate anoxic P uptake (see Supporting  
208 Information for full rate equations). The three growth rates below therefore represent growth of a  
209 single functional group split between 3 electron acceptors:  $\text{O}_2$ ,  $\text{NO}_2^-$ , and  $\text{NO}_3^-$ .

$$\begin{aligned} 210 \quad & \mu_{PAO,O_2} = \text{PAO growth associated with } O_2 \text{ } (d^{-1}) \\ 211 \quad & \mu_{PAO,NO_2^-} = \text{PAO growth associated with } NO_2^- \text{ } (d^{-1}) \\ 212 \quad & \mu_{PAO,NO_3^-} = \text{PAO growth associated with } NO_3^- \text{ } (d^{-1}) \end{aligned}$$

213 Rate equations and parameters values for the above modeled growth rates, along with the  
214 process representation in SIMBA#, can be found in the Supporting Information.

#### 215 **2.4 Biomass sampling and DNA extraction**

216 Reactor biomass was archived biweekly for sequencing-based analyses. Six 1 mL aliquots of  
217 mixed liquor were centrifuged at 10,000g for 3 minutes, and the supernatant was replaced with 1  
218 mL of tris-EDTA buffer. The biomass pellet was then vortexed and centrifuged at 10,000g for 3  
219 minutes after which the supernatant was removed, leaving only the biomass pellet to be transferred  
220 to the -80°C freezer. All samples were kept at -80°C until DNA extraction was performed with the  
221 FastDNA SPIN Kit for Soil (MPBio, Santa Ana, CA, USA) per the manufacturer's instructions.

#### 222 **2.5 16S rRNA gene amplicon sequencing**

223 16S rRNA gene amplicon library preparations were performed using a two-step multiplex PCR  
224 protocol, as previously described<sup>29</sup>. All PCR reactions were performed using a Biorad T-100  
225 Thermocycler (Bio-Rad, Hercules, CA). The V4-V5 region of the universal 16S rRNA gene was  
226 amplified in duplicate from 20 dates collected over the course of reactor operation using the 515F-  
227 Y/926R primer set<sup>30</sup>. Further details on thermocycling conditions, reagents, and primer sequences  
228 can be found in Supporting Information.

229 All amplicons were sequenced using a MiSeq system (Illumina, San Diego, CA, USA) with  
230 Illumina V2 (2x250 paired end) chemistry at the University of Illinois at Chicago DNA Services  
231 Facility and deposited in GenBank (accession number for raw data: PRJNA527917). Procedures  
232 for sequence analysis and phylogenetic inference can be found in the Supporting Information.

233

234

235

## 236 **2.6 Quantitative Polymerase Chain Reaction (qPCR)**

237 qPCR assays were performed targeting the ammonia oxidizing bacterial *amoA* gene via the  
238 *amoA*-1F and *amoA*-2R primer set <sup>31</sup>, and total bacterial (universal) 16S rRNA genes via the  
239 Eub519/Univ907 primer set <sup>32</sup>. All assays employed thermocycling conditions reported in the  
240 reference papers and were performed on a Bio-Rad C1000 CFX96 Real-Time PCR system (Bio-  
241 Rad, Hercules, CA, USA). Details on reaction volumes and reagents can be found in the  
242 Supporting Information. After each qPCR assay, the specificity of the amplification was verified  
243 with melt curve analysis and agarose gel electrophoresis.

244

## 245 **3. Results and Discussion**

### 246 **3.1 Nitrogen, AOO and NOO**

#### 247 **3.1.1 Overall Performance and Nitrogen Removal**

248 To demonstrate feasibility and evaluate optimal operational conditions for integrated  
249 biological P and shortcut N removal via NOO out-selection at moderate temperatures, we operated  
250 lab-scale reactor fed with real primary effluent for 531 days. Reactor operation proceeded in two  
251 phases. Reactor performance across both phases is shown in Figure 1 and summarized in Table 3.  
252 Phase 1 (days 0-246) established proof-of-concept for the compatibility of N removal via  
253 nitrification-denitrification via intermittent aeration with EPBR and allowed for optimization of SRT  
254 and the aeration regime (intermittent aeration). P removal was consistent during Phase 1 (average  
255  $\text{PO}_4^{3-}$  removal = 83%) excepting aeration failures from reactor control issues around days 80 – 90.  
256 Because SRT control was utilized as one of the strategies for NOO out-selection, partial washout  
257 of AOO during Phase 1 was occasionally observed when mixed liquor wasting was too aggressive  
258 (i.e. total SRT less than 5 days,  $\text{SRT}_{\text{AER}}$  less than 2 days, see Figure S2), resulting in lower  $\text{NH}_4^+$

259 oxidation rates and higher effluent  $\text{NH}_4^+$ , after which wasting would be suspended to restore AOO  
260 mass. The average TIN removal during Phase 1 was 42% but reached >60% during periods of  
261 peak performance. The average TSS during Phase 1 was  $1,362 \pm 623$  mg/L, the VSS was  $1,052 \pm$   
262  $489$  mg/L, and the HRT was  $9.7 \pm 3.9$  hours not including settling and decant.

263 During Phase 2 (days 247-531), SRT control was optimized (total SRT =  $9.2 \pm 1.8$  days,  
264  $\text{SRT}_{\text{AER}} = 3.6 \pm 0.9$  days) and consistent  $\text{NH}_4^+$  and TKN removal ( $41 \pm 24$  mgN/L/d and  $54 \pm 29$   
265 mgN/L/d, respectively, considering influent and effluent values with HRT during Period 2) was  
266 achieved while maintaining NOO out-selection (described in section 3.1.2). The average HRT of  
267  $6.8 \pm 2.8$  hours (not including settling and decant) was lower than Phase 1 ( $9.7 \pm 3.9$  hours) due to  
268 improved AOO activity. Average TIN and  $\text{PO}_4^{3-}$  removal during Phase 2 was 68% and 91%,  
269 respectively (Table 3). Biological P removal was not impacted by N removal, and the P uptake  
270 rate consistently exceeded the  $\text{NH}_4^+$  removal rate during the aerated portion of the cycle (see Figure  
271 2.A&B for  $\text{PO}_4^{3-}$  and  $\text{NH}_4^+$  concentration profiles through typical cycles). This may have  
272 contributed to COD limitation for N removal via denitrification, as COD was most depleted at the  
273 end of the SBR cycles (Figure 2.A). This in turn may explain  $\text{NO}_2^-$  accumulation near the end of  
274 most cycles and higher P removal than N removal rates. Figure 2.A and 2.B also demonstrates the  
275 variability in react length that was often observed throughout the study due to differences in the  
276  $\text{NH}_4^+$  oxidation rate, possibly caused by fluctuations in AOO concentrations in the reactor. During  
277 Phase 2, the average TSS was  $1,773 \pm 339$  mg/L and the VSS was  $1,344 \pm 226$  mg/L.

### 278 3.1.2 NOO Out-selection

279 A crucial challenge to all shortcut N removal processes, including the nitrification-denitrification  
280 with EBPR process that we focus on here, is suppression of NOO activity. To address this  
281 challenge, we employed a combination of tight SRT control with intermittent aeration to limit

282 substrate ( $\text{NO}_2^-$ ) accumulation. Process monitoring results demonstrated elevated  $\text{NO}_2^-$   
283 concentrations in the effluent, suggesting successful suppression of NOO activity (Table 3 and  
284 Figure 1) with a nitrite accumulation ratio (NAR) of 70% during Phase 2. This observation was  
285 corroborated by fifteen in-cycle concentration profiles demonstrating  $\text{NO}_2^-$  accumulation greater  
286 than  $\text{NO}_3^-$  throughout the cycle (see Figure 2.A&B for two representative cycles). In addition,  
287 routine maximum activity assays for AOO and NOO demonstrated that during Phase 2 (optimized,  
288 stable reactor operation), maximum AOO activity was 3 to 4-fold greater than NOO (Figure 3).

289 To better understand NOO out-selection and nutrient dynamics during intermittent aeration  
290 and to provide additional support for suppression of NOO activity in this process, high frequency  
291 sampling (1 grab sample/minute for 40 minutes for measurement of  $\text{NH}_4^+$ ,  $\text{NO}_2^-$ ,  $\text{NO}_3^-$ , and  $\text{PO}_4^{3-}$   
292 ) was conducted during two typical SBR cycles on days 202 and 258 (Figure 4.A, data from day  
293 258 only shown). The resulting concentration profiles show  $\text{NO}_2^-$  accumulation with very little  
294  $\text{NO}_3^-$  accumulation during aeration. Two complete intermittent aeration intervals are shown in the  
295 early part of the cycle (note that intermittent aeration begins 45 minutes into the cycle), during  
296 which  $\text{NO}_2^-$  accumulates up to 0.4 mg $\text{NO}_2^-$ -N/L following 5 minutes of aeration, while  $\text{NO}_3^-$  does  
297 not get above 0.1 mg $\text{NO}_3^-$ -N/L. The NAR during the nitrite peak of these two aeration intervals  
298 was 84% and 95%, which demonstrates NOO suppression via selective nitrification. Then, in the  
299 subsequent anoxic intervals, the accumulated  $\text{NO}_2^-$  is drawn down via denitrification. This  
300 denitrification provides a robust nitrite sink and one of the methods for NOO out-selection, such that  
301  $\text{NO}_2^-$  is not available for NOO in the following interval.

302 Process model results validate the nutrient dynamics observed as seen in Figures 2 and 4. The  
303 process model offers additional insight into the mechanism for NOO out-selection. The net specific  
304 growth rates of AOO and NOO were calculated from model data output according to rate equations

305 from the inCTRL ASM matrix (see Supporting Information), and are plotted in parallel with the  
306 intermittent aeration intervals in Figure 4.C. Due to differences in substrate availability (i.e. high  
307  $\text{NH}_4^+$  and low  $\text{NO}_2^-$ ),  $\mu_{\text{NOO}}$  was less than  $\mu_{\text{AOO}}$  at the beginning of each aeration interval and  
308 remained below it throughout the 5 minutes of aeration. This specific growth rate differential was  
309 maintained throughout much of the cycle, but  $\mu_{\text{NOO}}$  roughly equaled  $\mu_{\text{AOO}}$  by the end of the  
310 intermittently aerated react phase due to the accumulation of  $\text{NO}_2^-$  (data not shown). However, the  
311 differential in net specific growth rates in the early part of the SBR cycle ensures that AOO can be  
312 maintained in the reactor at a lower SRT than NOO. The modeled average net specific growth rate  
313 (including decay) over the cycle can be used to infer a theoretical SRT for NOO to avoid washout,  
314 which in this case was 13.2 days ( $\text{SRT}_{\text{AER}} = 5.3$ ) days. A similar calculation using the average net  
315 specific growth rate of AOO gives an SRT of 8.2 days ( $\text{SRT}_{\text{AER}} = 3.3$  days), which affirms that  
316 AOO are retained via the modeled SRT of 9.5 days. This differential in theoretical SRT (13.2 days  
317 for NOO, 8.2 days for AOO) was found with standard kinetic modeling that did not invoke  
318 metabolic lag times of NOO (i.e. Gilbert et al., 2014), indicating that substrate limitation alone is  
319 sufficient to explain NOO out-competition in this process. The average reactor SRT during Phase  
320 2 was  $9.2 \pm 1.8$  days ( $\text{SRT}_{\text{AER}} = 3.6 \pm 0.9$  days) which, because it is in between the theoretical  
321 AOO and NOO SRT values indicated above, reinforces experimental data indicating that SRT  
322 control was optimized to washout NOO and retain AOO. Both reactor and modeling results  
323 therefore confirm that a combination of intermittent aeration and SRT control can be used to  
324 maintain nitrification-denitrification under mainstream conditions. Furthermore, these results suggest  
325 that NOO suppression via intermittent aeration and SRT control can be explained by simple  
326 substrate (kinetic) limitations alone without invoking more complex mechanisms such as  
327 metabolic lag time<sup>14</sup> or free ammonia inhibition<sup>15</sup>.



### 328 3.1.3 N<sub>2</sub>O Emissions

329 N<sub>2</sub>O emissions were measured during 8 separate cycles during steady performance in Phase 2  
330 (between days 414 – 531) and ranged from 0.2 to 6.2% of the influent TKN load, with an average  
331 of  $2.2 \pm 2.0\%$  (Table S2). N<sub>2</sub>O emissions relative to TIN removal averaged  $5.2 \pm 4.5\%$ . N<sub>2</sub>O  
332 accumulation in the reactor generally paralleled NO<sub>2</sub><sup>-</sup> accumulation near the end of the aerated  
333 portion of the cycle. For example, on the N<sub>2</sub>O test on day 414 (Figure 2.B), grab sampling  
334 throughout the cycle revealed that by the time NO<sub>2</sub><sup>-</sup> first accumulated above 0.1 mgNO<sub>2</sub>-N/L at  
335 285 minutes, 57% of the TIN removal for that cycle had occurred while only 20% of the N<sub>2</sub>O had  
336 been emitted, indicating that relative N<sub>2</sub>O emissions increased in the presence of elevated NO<sub>2</sub><sup>-</sup>.

337 The above measurements are comparable to reported N<sub>2</sub>O emission rates for conventional  
338 biological nutrient removal (BNR) processes. Ahn et al. (2010) reported a range of 0.01 – 1.8%  
339 N<sub>2</sub>O emitted relative to influent TKN at 12 full-scale wastewater treatment plants (WWTPs),  
340 which included both conventional BNR and non-BNR processes. Foley et al., 2010 reported a  
341 much larger range of 0.6 – 25% N<sub>2</sub>O emitted relative to TIN removed at 7 full-scale conventional  
342 BNR WWTPs. Both studies found that N<sub>2</sub>O emissions were correlated with high NO<sub>2</sub><sup>-</sup>  
343 concentrations, as was the case in our reactor (Figure 2.B). In fact, of the eight cycles analyzed for  
344 N<sub>2</sub>O emissions, the four tests with the highest effluent NO<sub>2</sub><sup>-</sup> also had the four highest N<sub>2</sub>O  
345 emissions. Ahn et al. emphasized that the bulk of N<sub>2</sub>O emissions occur in aerobic zones due to air  
346 stripping of N<sub>2</sub>O; indeed, in our reactor 92% of the N<sub>2</sub>O emitted from the in-cycle test on day 414  
347 (for example) occurred during aeration. N<sub>2</sub>O mass transfer (i.e. stripping) coefficients for our  
348 reactor were 40 times higher during aeration and mixing than during mixing alone ( $0.0688 \text{ min}^{-1}$   
349 and  $0.0017 \text{ min}^{-1}$ , respectively).

350 Other shortcut N removal biotechnologies, such as PN/A, have been found to have elevated  
351 N<sub>2</sub>O production levels over conventional methods for biological N removal<sup>18-21</sup>. Both Desloover  
352 et al. and Kampschreur et al. (who measured 5.1 – 6.6% and 2.3% N<sub>2</sub>O production relative to  
353 influent TKN, respectively) found that a separate nitrification step (as opposed to simultaneous  
354 nitrification and anammox) caused increased N<sub>2</sub>O production by AOO, which may be due to elevated  
355 NO<sub>2</sub><sup>-</sup> concentrations. However, it is not clear that AOO are causing the bulk of N<sub>2</sub>O production in  
356 our system or other nitrification-denitrification systems, as low COD concentrations can induce  
357 incomplete denitrification and lead to elevated N<sub>2</sub>O production<sup>35-37</sup>. Indeed, NO<sub>2</sub><sup>-</sup> and N<sub>2</sub>O  
358 accumulation occurs at the end of the SBR cycles (Figure 2.B) where COD is most depleted from  
359 aeration. This suggests that N<sub>2</sub>O emissions from this reactor could be mitigated by a step-feed  
360 process, i.e. by filling additional primary effluent to prevent a low COD:N ratio and avoid NO<sub>2</sub><sup>-</sup>  
361 and N<sub>2</sub>O accumulation at the end of the cycle. Additional research is required to test the effects of  
362 this strategy.

363 An additional potential benefit of a step-feed modification could be a reduction in the  
364 effluent NO<sub>2</sub><sup>-</sup> concentration. Elevated NO<sub>2</sub><sup>-</sup> concentrations in discharge to surface waters is  
365 undesirable in part due to its toxicity to fish and other aquatic life<sup>38</sup>. Aside from a step-feed system,  
366 potential solutions to elevated NO<sub>2</sub><sup>-</sup> include a final nitrification step (for oxidation of NO<sub>2</sub><sup>-</sup> to NO<sub>3</sub><sup>-</sup>  
367 ) or an anammox polishing step (as suggested by Regmi et al., 2015). It should be noted that  
368 anammox on seeded biocarriers similar to those in the ANITA<sup>TM</sup>Mox process<sup>40</sup> could be  
369 incorporated into the same reactor for increased N removal, thus eliminating the need for a two-  
370 stage system.

### 371 **3.2 P removal and PAOs**

372 Consistent P removal was achieved in Phase 2 and most of Phase 1 (Figure 1, Table 3). EBPR  
373 performance was not negatively impacted by long-term nitrification-denitrification; in fact, the P  
374 uptake rate exceeded the  $\text{NH}_4^+$  removal rate throughout the study (see Figure 2.A&B for two  
375 representative cycles), indicating that SRT and HRT control to optimize AOO activity (while  
376 minimizing NOO activity) ensured sufficient retention and react times for PAOs. The total P  
377 removal rate during Phase 2 was  $6.8 \pm 2.7$  mgP/L/d when considering the entire SBR cycle. The P  
378 uptake rate from in-cycle testing during Phase 2 was  $105 \pm 34$  mgP/L/d (or  $3.4 \pm 1.1$   
379 mgP/gVSS/hour) when considering the linear portion of P uptake during the aerated react phase  
380 (Figure S3).

381 High frequency sampling (Figure 4.A) and model results (Figure 4.B) both demonstrate P  
382 removal during aeration coupled to little to no P removal during periods of anoxia. Importantly,  
383 this indicates that P release did not occur in the absence of oxygen, verifying that intermittent  
384 aeration with periods of anoxia is compatible with EBPR technologies. However, it also indicates  
385 that relatively little denitrifying P uptake occurred, even under anoxic conditions when  $\text{NO}_2^-$  was  
386 present. This suggests that P uptake by aerobic PAO metabolism rather than by denitrifying PAOs  
387 (DPAOs) was the predominant driver of P removal. Figure 4.D shows the modeled specific  
388 PAO/DPAO growth rates associated with P uptake. Kinetic insights from the process model, which  
389 models PAOs as a single group capable of using  $\text{O}_2$ ,  $\text{NO}_2^-$  and  $\text{NO}_3^-$  as electron acceptors for P  
390 uptake, show that the combination of low  $\text{NO}_2^-$  and inhibition due to  $\text{O}_2$  prevented appreciable  
391 DPAO activity during intermittent aeration. Modeled P uptake via  $\text{NO}_2^-$  was only 16% of total P  
392 uptake, and modeled P uptake via  $\text{NO}_3^-$  was even lower at only 0.7% of total P uptake due to  
393 limited  $\text{NO}_3^-$  accumulation. The process model suggests that the presence of residual DO, rather  
394 than a lack of  $\text{NO}_2^-$  or  $\text{NO}_3^-$ , was the primary inhibitor of DPAO activity. Figure 4.D shows that

395 peak DPAO growth in the model occurred not at the maximum  $\text{NO}_2^-$  concentration (i.e. 75  
396 minutes) but when DO had reached near zero (i.e. 78 minutes), at which point  $\text{NO}_2^-$  was at about  
397 half of the maximum concentration. Finally, while in-reactor, in-cycle measurements of DPAO  
398 activity are difficult to make, *ex situ* measurements of P uptake rates via  $\text{O}_2$ ,  $\text{NO}_2^-$  and  $\text{NO}_3^-$  showed  
399 that the P uptake via  $\text{NO}_2^-$  was 17% relative to  $\text{O}_2$ , while that of  $\text{NO}_3^-$  was 14% relative to  $\text{O}_2$   
400 (Figure 5). The high frequency sampling plots, DPAO modeling and *ex situ* P uptake tests all  
401 indicate that DPAO activity likely plays a relatively minor role in P removal in this reactor.

402 The minor role of DPAOs in this process countered our original expectation that frequent  
403 periods of anoxia coupled to the presence of  $\text{NO}_2^-$  would select for a significant DPAO population.  
404 DPAOs are considered advantageous in combined N and P removal processes because they offer  
405 the opportunity to reduce carbon demand and aeration requirements<sup>41</sup>. Lee et al. (2001) were able  
406 to achieve 64% DPAO activity (relative to total P uptake) by introducing a single long anoxic  
407 phase (with both  $\text{NO}_2^-$  and  $\text{NO}_3^-$  present) in the middle of the aerobic phase, which suggests that  
408 longer intermittent aeration intervals may select for more DPAO activity (but perhaps at the  
409 expense of NOO out-selection). However, preference for DO does not explain the low P uptake  
410 via  $\text{NO}_2^-$  or  $\text{NO}_3^-$  in the absence of  $\text{O}_2$  (Figure 5) from *ex situ* batch tests in our reactor. Zeng et al.  
411 (2003b) observed that *Accumulibacter* PAOs (which were also identified in this study, see Section  
412 3.3) previously acclimated to aerobic P uptake exhibited a 5-hour lag phase in P-uptake when  
413 exposed to anoxic conditions ( $\text{NO}_3^-$ ) in place of aeration. A metabolic lag phase is unlikely to  
414 explain low maximum P uptake via  $\text{NO}_2^-$  or  $\text{NO}_3^-$  in this reactor, however, given that linear  
415 drawdown of  $\text{NO}_2^-$  or  $\text{NO}_3^-$  was observed in all *ex situ* batch tests. A large majority of *Candidatus*  
416 *Accumulibacter phosphatis* genomes sequenced to date have contained the gene encoding nitrite  
417 reductase (responsible for reducing  $\text{NO}_2^-$  to nitric oxide [NO])<sup>43</sup>, suggesting that most, if not all,

418 *Accumulibacter* PAOs harbor genomic machinery necessary for denitrifying P uptake via  $\text{NO}_2^-$ .  
419 Whether the lack of DPAO activity in this reactor and others is due to the types of PAOs present  
420 (and thus the presence or absence of denitrifying genes) or due to the relative expression/inhibition  
421 of denitrifying genes present in the PAOs requires further study.

422 As previously stated, shortcut N removal via nitrification-denitrification did not negatively impact  
423 EBPR in this study. Instances of relatively poor P removal were instead usually associated with  
424 wet weather flows. Rain not only dilutes the influent but may also induce higher redox conditions  
425 in the collection system, indicating a lack of fermentation and little formation of the VFAs that are  
426 beneficial to the EBPR process. On sampling days when primary effluent VFAs were at or below  
427 the detection limit of 5 mg acetate/L ( $n = 21$ ), the average  $\text{PO}_4^{3-}$  removal of 63% was significantly  
428 lower ( $p$  value = 0.003) than the average  $\text{PO}_4^{3-}$  removal of 93% on days when VFAs were greater  
429 than 5 mg acetate/L ( $n = 81$ ).

430 Shortcut N removal systems can be problematic for EBPR if  $\text{NO}_2^-$  accumulation leads to  
431 elevated concentrations of its conjugate acid, nitrous acid ( $\text{HNO}_2$ ).  $\text{HNO}_2$  concentrations above  
432  $0.5 \times 10^{-3}$  mg  $\text{HNO}_2$ -N/L can lead to inhibition of *Candidatus Accumulibacter* PAOs<sup>45</sup>, which were  
433 the dominant PAO identified in this study (see Section 3.3). In the extreme case, the maximum  
434  $\text{NO}_2^-$  concentration in the effluent of our reactor (e.g. end of the SBR cycle) of 5.4 mg  $\text{NO}_2^-$ -N/L  
435 combined with the minimum pH of 7.0 (which did not actually occur simultaneously) corresponds  
436 to  $0.96 \times 10^{-3}$  mg  $\text{HNO}_2$ -N/L with  $\text{pK}_a$  of 3.25 for  $\text{HNO}_2$ <sup>46</sup>. This indicates that  $\text{HNO}_2$  was rarely, if  
437 ever, above the reported PAO inhibition concentration in our reactor. Moreover, the highest  $\text{NO}_2^-$   
438 concentrations occurred near the end of the cycle when the majority of  $\text{PO}_4^{3-}$  had already  
439 accumulated intracellularly as polyphosphate, and residual  $\text{NO}_2^-$  from the end of the cycle was  
440 rapidly depleted after filling at the top of the following cycle.

### 441 3.3 Functional Guild Analysis: PAO, NOO, and AOO

442 We used 16S rRNA gene sequencing to evaluate diversity and relative abundance of PAOs,  
443 NOO, and AOO in the reactor. *Candidatus* Accumulibacter was the dominant genus of PAO in  
444 the SBR throughout the study and ranged in relative abundance from 6.6% to 12.0% (Figure S4).  
445 *Tetrasphaera* was detected at most time points but always below 0.3% relative abundance.  
446 Glycogen accumulating organisms (GAOs) in the genus *Candidatus* Competibacter, which are  
447 potential competitors to PAOs, were consistently less abundant than PAOs, and varied from below  
448 the detection limit to 2.4% relative abundance. Other putative GAOs, such as the genera  
449 *Defluviicoccus* and *Propionivibrio*<sup>47</sup>, were found at even lower abundance than *Candidatus*  
450 Competibacter (data not shown).

451 *Nitrotoga* and *Nitrospira* alternately dominated the NOO population according to 16S  
452 rRNA gene sequencing (Figure 6). The reason for the alternation is unknown as the timing of  
453 succession did not clearly correlate with reactor control or performance, although Keene et al.  
454 (2017) observed a similar phenomenon. *Nitrospira* dominated at the beginning of Phase 2, and  
455 although the NOO population shifted to *Nitrotoga* over the next 100 – 200 days, there was no  
456 corollary change in nitrification-denitrification performance, the NAR, or N removal. This result  
457 suggests that the observed robust suppression of NOO activity in this process does not depend  
458 upon complete washout of either *Nitrospira* or *Nitrotoga*.

459 *Nitrosomonas*-affiliated Betaproteobacteria were the dominant AOO throughout the study  
460 according to 16S rRNA gene sequencing but were present at surprisingly low relative abundance  
461 for the 2<sup>nd</sup> half of Phase 1 and all of Phase 2 of reactor operation. Interestingly, the relative  
462 abundance of *Nitrosomonas* based on 16S rRNA gene sequencing was below the detection limit  
463 for selected samples between days 293 – 431 (Phase 2, Figure 6). No other known AOO were

464 detected during that time; ammonia oxidizing archaea were detected at only two timepoints before  
465 day 100 and at low abundance (< 0.04%). Other potential AOO genera, such as *Nitrospira* and  
466 *Nitrosococcus*, were not detected in any 16S rRNA gene sequencing samples. *Nitrospira* can  
467 include complete ammonia oxidizing (comammox) clades<sup>49</sup>, and comammox can in some cases  
468 be the dominant AOO<sup>27</sup> in wastewater treatment. However, *Nitrospira* were not detected or were  
469 at low abundance (< 0.04%) after day 293. The decline in AOO was confirmed by qPCR via the  
470 functional bacterial *amoA* gene (Figure S5), although AOO were still detected at all time points  
471 via qPCR with a minimum of 0.15% relative abundance on day 421. Although the NH<sub>4</sub><sup>+</sup> oxidation  
472 rate was variable throughout Phase 2 (Figure S3), NH<sub>4</sub><sup>+</sup> oxidation activity was maintained  
473 throughout the experimental period. This suggests that either *Nitrosomonas* AOO can maintain  
474 effective NH<sub>4</sub><sup>+</sup> oxidation rates at very low abundance or an as-yet unidentified organism  
475 contributed to NH<sub>4</sub><sup>+</sup> oxidation<sup>50</sup>.

476

#### 477 **4. Conclusions**

478 This study is the first to demonstrate robust combined shortcut N and P removal from real  
479 wastewater without exogenous carbon or chemical addition at the moderate average wastewater  
480 temperature of 20°C. Mainstream nitrification-denitrification was achieved for more than 400 days via  
481 intermittent aeration and SRT control, with an average NAR of 70% during Phase 2. Process  
482 modeling reproduced this performance and confirmed that NOO activity was suppressed with a  
483 combination of NO<sub>2</sub><sup>-</sup> drawdown via denitrification and washout via SRT control, and provided  
484 possible explanations for the relative lack of DPAO activity. Importantly, neither NO<sub>2</sub><sup>-</sup>  
485 accumulation nor periods of anoxia in intermittent aeration adversely affected EBPR performance,  
486 and consistent and integrated shortcut TIN and biological P removal were achieved for more than  
487 400 days. N<sub>2</sub>O emissions were in line with observations of other shortcut N removal systems and  
488 were primarily associated with NO<sub>2</sub><sup>-</sup> accumulation at the end of the cycle. The single-sludge  
489 nutrient removal process examined here, as compared to two-stage systems with separate sludges,  
490 could reduce operating cost and complexity while meeting nutrient removal goals.

491



492 **5. Conflicts of Interest**

493 There are no conflicts of interest to declare.

494

495 **6. Acknowledgements**

496 Many thanks to Christian Landis, Adam Bartecki, George Velez, Sandra Matual, Robert  
497 Swanson, Thaís Pluth, Thota Reddy, and O’Brien WRP staff and operators.

498 This study was funded by the Metropolitan Water Reclamation District of Greater Chicago and  
499 the National Science Foundation Graduate Research Fellowship under Grant No. DGE-1324585.

500

501 **Table 1.** SBR cycle timing (gravity fill, anaerobic reactor, aerobic react, wasting, settling, and  
502 decant) and reactor control details. The end of the SBR aerobic (intermittently aerated) react  
503 phase was determined based on an  $\text{NH}_4^+$  setpoint shown in the table.

|                                                                                                      | <i>Phase 1</i> | <i>Phase 2</i> |
|------------------------------------------------------------------------------------------------------|----------------|----------------|
| Days of operation                                                                                    | 0 to 246       | 247 to 531     |
| Gravity fill (min)                                                                                   | 3 to 6         |                |
| Anaerobic react (min)                                                                                | 45             |                |
| Aerobic react via intermittent aeration (min)                                                        | $317 \pm 146$  | $206 \pm 105$  |
| Wasting (min)                                                                                        | 0 to 2.2       |                |
| Settling (min)                                                                                       | 30 to 40       |                |
| Decant of 5/8 volume fraction (min)                                                                  | 4.5 to 6.0     |                |
| Online $\text{NH}_4^+$ -based control target effluent concentration ( $\text{mgNH}_4^+\text{-N/L}$ ) | 3 to 5         | 1.5 to 2       |

504

505

506 **Table 2.** Sampling frequency and target analytes (per APHA, 2005) for daily composite samples.  
507 All samples listed are of reactor influent and effluent except NO<sub>2</sub><sup>-</sup>-N (effluent only) and mixed  
508 liquor TSS and VSS (sampled in-reactor).

| <b>Analyte</b>                                   | <b>Samples<br/>per week</b> |
|--------------------------------------------------|-----------------------------|
| Total COD                                        | 3                           |
| Filtered COD (1.2 μm filter)                     | 3                           |
| Alkalinity                                       | 3                           |
| Total Kjeldahl Nitrogen                          | 3                           |
| NH <sub>4</sub> <sup>+</sup> -N                  | 3                           |
| NO <sub>x</sub> <sup>-</sup> -N <sup>1</sup>     | 3                           |
| NO <sub>2</sub> <sup>-</sup> -N (effluent only)  | 3                           |
| Total Phosphorus                                 | 3                           |
| Ortho-Phosphate                                  | 2                           |
| TSS <sup>2</sup> & VSS <sup>3</sup>              | 1                           |
| Mixed Liquor TSS <sup>2</sup> & VSS <sup>3</sup> | 2                           |

<sup>1</sup> NO<sub>x</sub><sup>-</sup>-N = NO<sub>2</sub><sup>-</sup>-N + NO<sub>3</sub><sup>-</sup>-N

<sup>2</sup> TSS = total suspended solids

<sup>3</sup> VSS = volatile suspended solids

509

510

511 **Table 3.** Arithmetic mean  $\pm$  standard deviation of composite sampling results for influent  
 512 (primary effluent) and reactor effluent concentrations. Results from Phase 1 are highlighted in  
 513 light gray and results from Phase 2 are highlighted in dark gray. Process model predictions are  
 514 for Phase 2 only. Additional information regarding influent COD fractionation can be found in  
 515 Table S1.

|                                       | Phase 1: Days 0 - 246 |                     |  | Phase 2: Days 247 - 531 |                     |                                  | Reactor<br>Percent<br>Removal | Modeled<br>Percent<br>Removal <sup>a</sup> |
|---------------------------------------|-----------------------|---------------------|--|-------------------------|---------------------|----------------------------------|-------------------------------|--------------------------------------------|
|                                       | Influent              | Reactor<br>Effluent |  | Influent                | Reactor<br>Effluent | Modeled<br>Effluent <sup>a</sup> |                               |                                            |
| TKN (mgN/L)                           | 21.3 $\pm$ 5.1        | 8.4 $\pm$ 4.7       |  | 17.9 $\pm$ 5.3          | 2.8 $\pm$ 1.2       | 4.4                              | 85%                           | 76%                                        |
| NH <sub>4</sub> <sup>+</sup> (mgN/L)  | 15.8 $\pm$ 4.2        | 6.9 $\pm$ 4.2       |  | 13.5 $\pm$ 4.5          | 1.7 $\pm$ 1.1       | 2.0                              | 87%                           | 85%                                        |
| NO <sub>2</sub> <sup>-</sup> (mgN/L)  | --- <sup>b</sup>      | 1.5 $\pm$ 1.1       |  | --- <sup>b</sup>        | 1.9 $\pm$ 1.1       | 0.3                              | <i>not applicable</i>         |                                            |
| NO <sub>3</sub> <sup>-</sup> (mgN/L)  | --- <sup>b</sup>      | 0.9 $\pm$ 1.2       |  | --- <sup>b</sup>        | 0.8 $\pm$ 0.5       | 0.05                             | <i>not applicable</i>         |                                            |
| NAR <sup>c</sup> (%)                  |                       | 62%                 |  |                         | 70%                 | 85%                              | <i>not applicable</i>         |                                            |
| PO <sub>4</sub> <sup>3-</sup> (mgP/L) | 1.8 $\pm$ 0.6         | 0.3 $\pm$ 0.4       |  | 1.4 $\pm$ 0.5           | 0.1 $\pm$ 0.2       | 0.16                             | 91%                           | 89%                                        |
| Total P (mgP/L)                       | 2.6 $\pm$ 0.6         | 0.4 $\pm$ 0.5       |  | 2.2 $\pm$ 0.7           | 0.4 $\pm$ 0.5       | 1.0                              | 83%                           | 56%                                        |
| Total COD (mgCOD/L)                   | 176 $\pm$ 55          | 30 $\pm$ 24         |  | 150 $\pm$ 46            | 28 $\pm$ 11         | 47                               | 81%                           | 69%                                        |
| Filtered COD <sup>d</sup> (mgCOD/L)   | 107 $\pm$ 31          | 27 $\pm$ 17         |  | 94 $\pm$ 32             | 24 $\pm$ 6          | 27                               | 74%                           | 72%                                        |
| Alkalinity (meq/L)                    | 4.6 $\pm$ 0.9         | 3.8 $\pm$ 0.7       |  | 4.7 $\pm$ 0.6           | 3.8 $\pm$ 0.7       | 4.1                              | 20%                           | 13%                                        |
| TSS (mg/L)                            | 50 $\pm$ 27           | 12 $\pm$ 28         |  | 72 $\pm$ 47             | 18 $\pm$ 19         | 23                               | 75%                           | 68%                                        |

<sup>a</sup> Average primary effluent values from Phase 2 were used as influent to the process model

<sup>b</sup> 79% of influent NO<sub>x</sub><sup>-</sup> (combined NO<sub>2</sub><sup>-</sup> + NO<sub>3</sub><sup>-</sup>) measurements below the detection limit of 0.15 mgN/L

<sup>c</sup> NAR = nitrite accumulation ratio

<sup>d</sup> "Filtered COD" indicates filtration through 1.2  $\mu$ m filter, not to be confused with "floc-filtered COD" (see Methods)

516

517

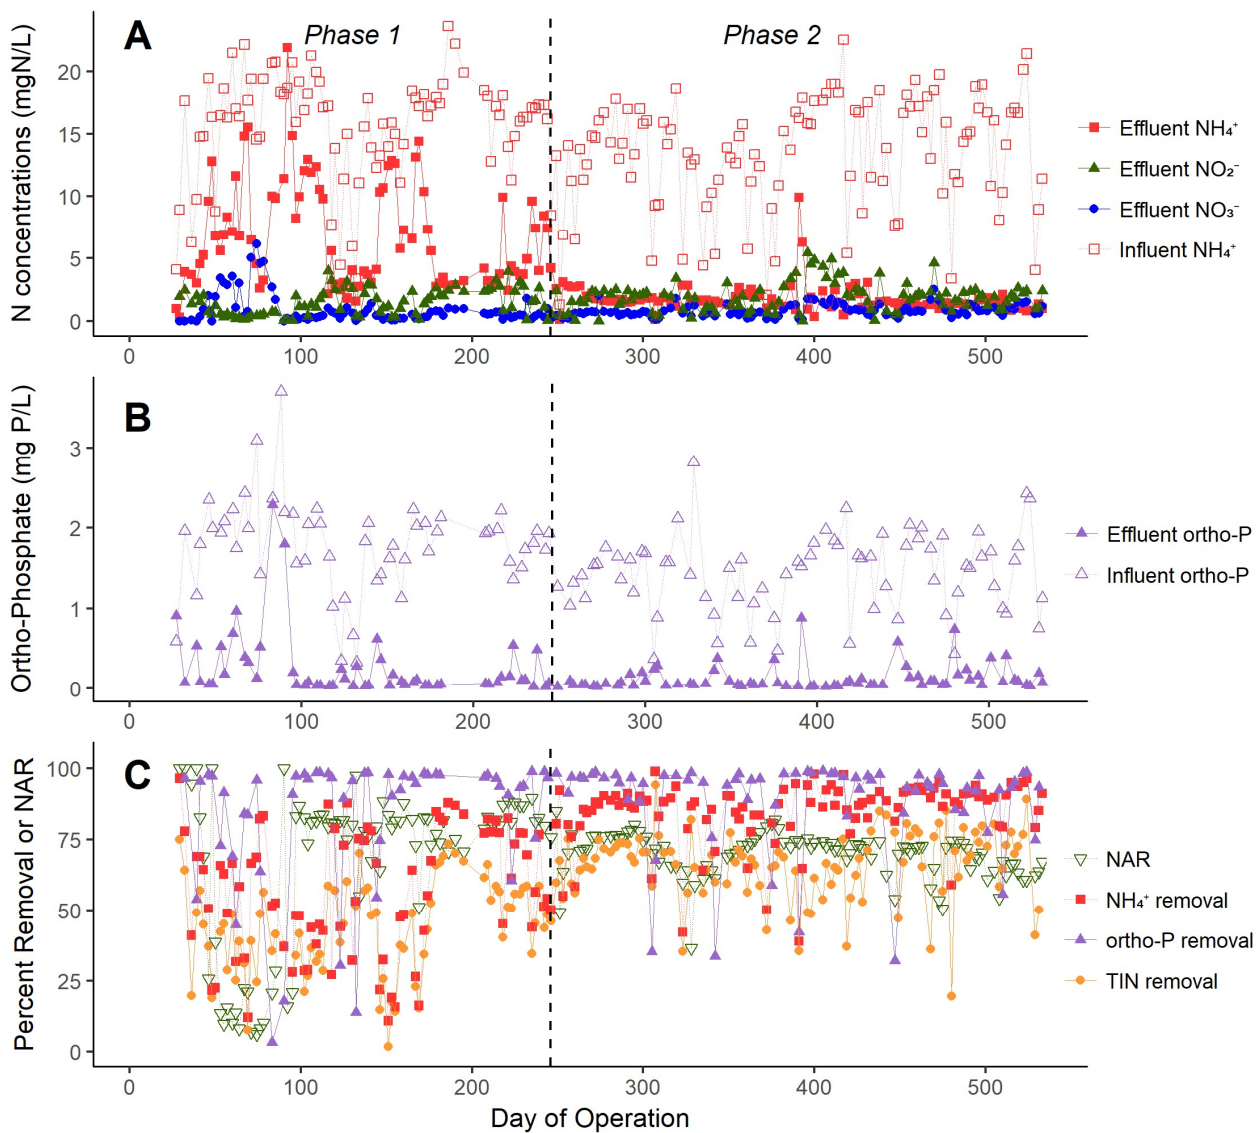

518

519 **Figure 1.** Reactor performance over time from composite sampling (2 – 3 samples/week) over  
520 the entire study. **A)** Influent (primary effluent) NH<sub>4</sub><sup>+</sup> and effluent NH<sub>4</sub><sup>+</sup>, NO<sub>2</sub><sup>-</sup>, and NO<sub>3</sub><sup>-</sup>. **B)**  
521 Influent and effluent orthophosphate. **C)** Nitrite accumulation ratio (NAR) and percent removal  
522 of NH<sub>4</sub><sup>+</sup>, orthophosphate and TIN.

523

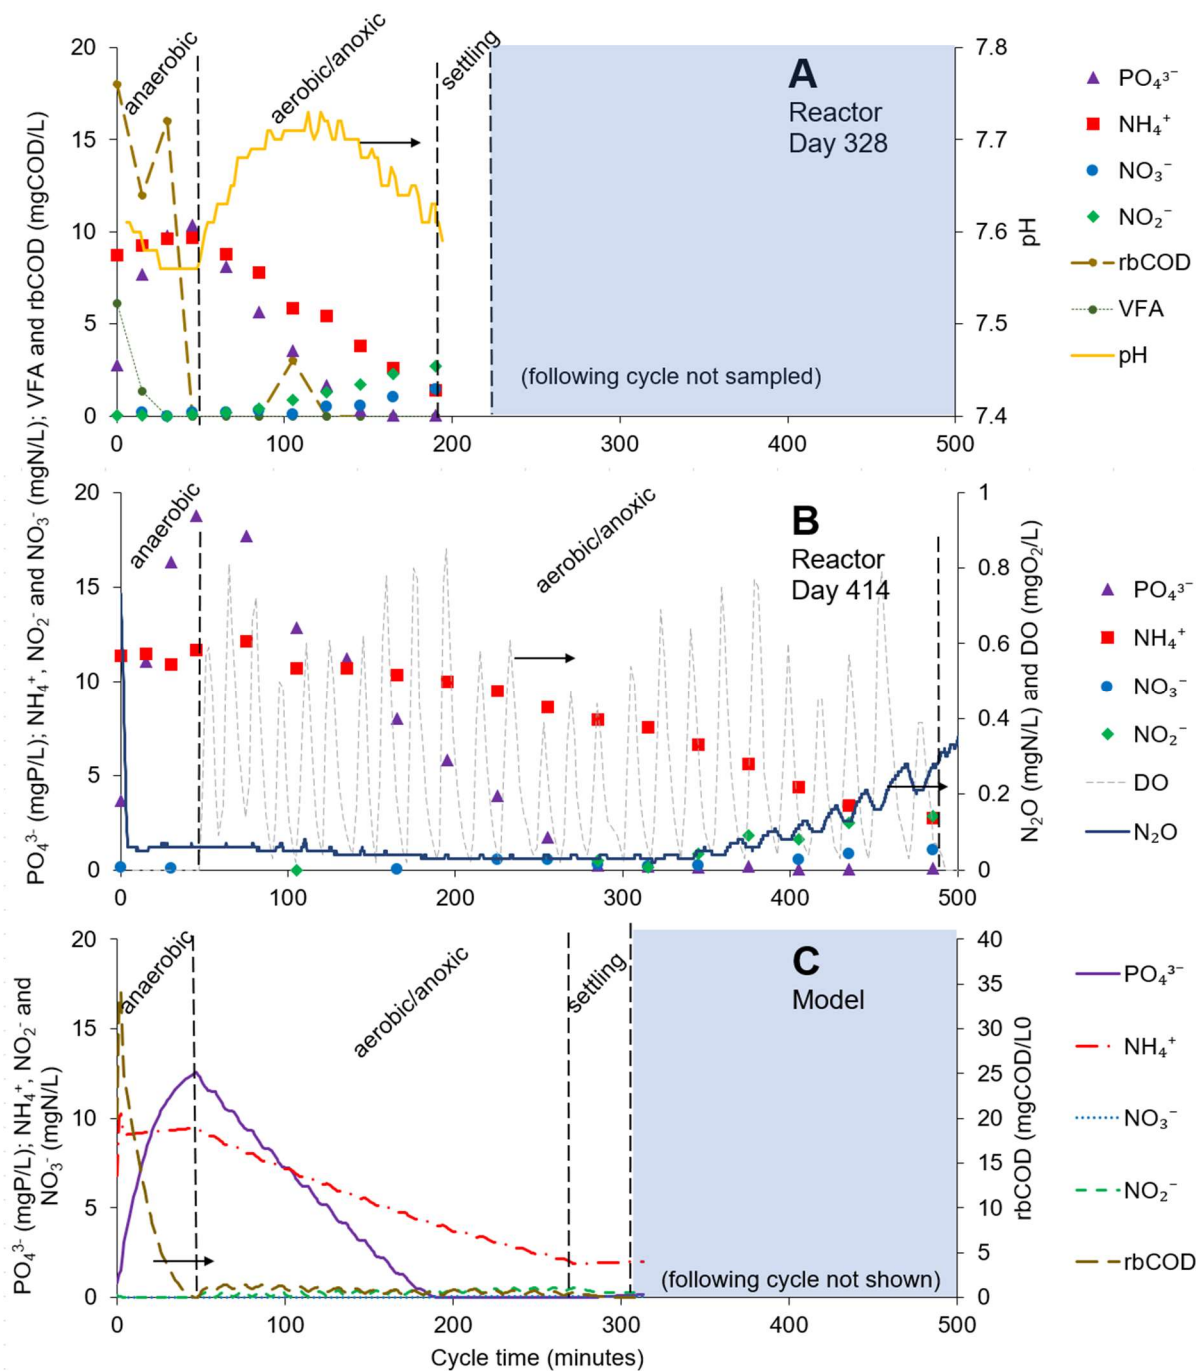

524

525 **Figure 2. A) and B)** Two react cycles on days 328 and 414, respectively, that demonstrate  
 526 efficient P and N removal, selective nitrification, and variability in aerated react length. Cycle **A**  
 527 included measurements for rbCOD and VFAs, and cycle **B** was run with an  $\text{N}_2\text{O}$  sensor in the  
 528 reactor. **C)** SBR cycle as modeled in SIMBA#. rbCOD as shown was calculated as soluble COD<sub>t</sub>  
 529 – soluble COD<sub>effluent</sub>.

530

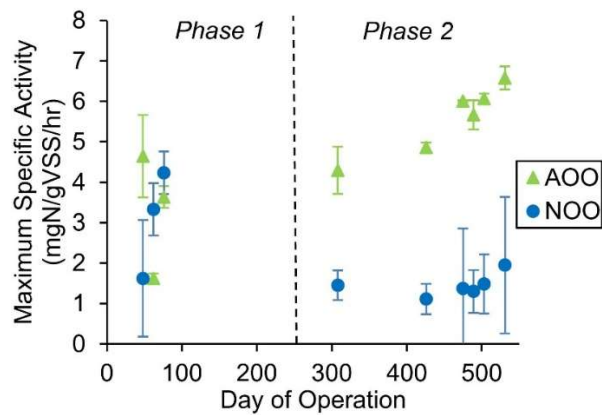

531

532 **Figure 3.** Maximum specific AOO and NOO activity as measured by *ex situ* batch testing. Error  
533 bars represent the standard deviation of the method replicates.

534

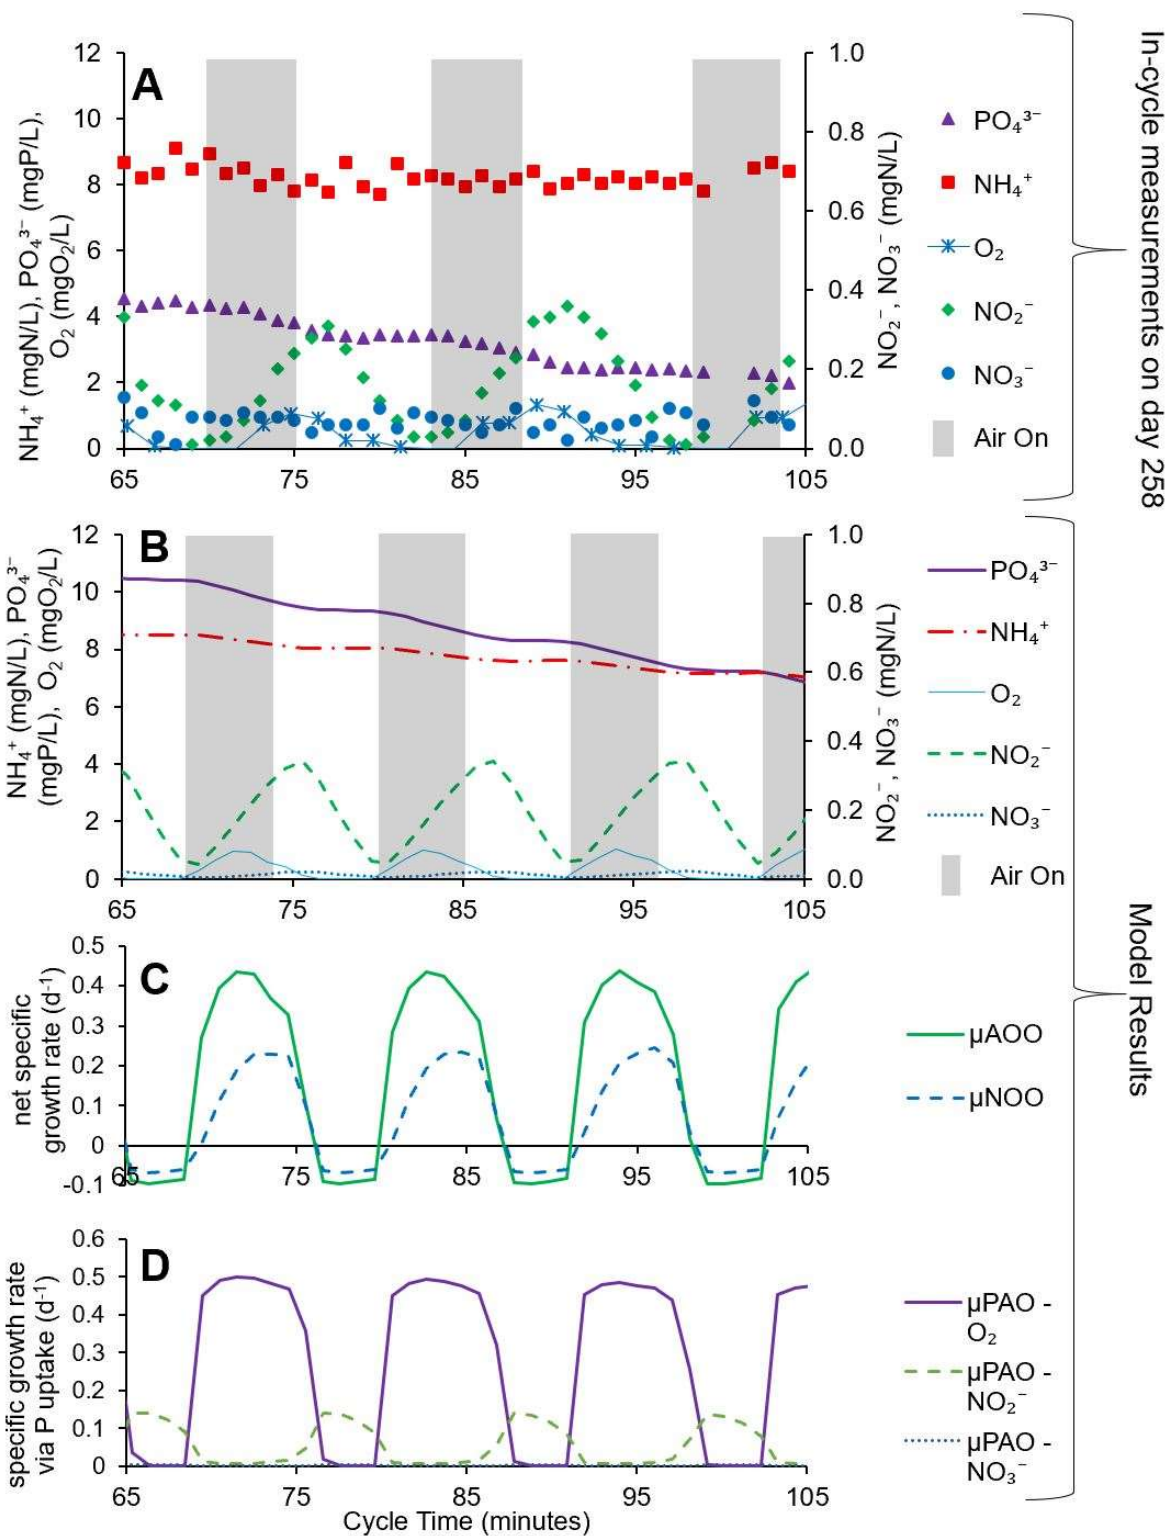

535

536 **Figure 4.** Comparison plot between high resolution within-cycle reactor sampling (A) and  
 537 modeled results (B, C, D) for the intermittently aerated reactor period of SBR operation (minutes  
 538 65 – 105, beginning 20 minutes after the start of aeration). **A)** Results of grab sampling from a  
 539 reactor cycle on day 258 of operation. Selective nitritation rather than nitratation during aerated



540 phases (gray shading) is evident and produced  $\text{NO}_2^-$  is then denitrified in anoxic phases. The  
541 s::can optical DO sensor is rated for a 60-second response time, and a ~1-minute delay is evident  
542 in comparison to the model plot B. **B)** Modeled concentration dynamics including on/off  
543 switching for aeration control. **C)** Modeled AOO and NOO net specific growth rates including  
544 decay. **D)** Modeled PAO specific growth rates associated with P uptake via  $\text{O}_2$ ,  $\text{NO}_2^-$  and  $\text{NO}_3^-$ .  
545 Decay and growth not associated with P uptake are not included.

546

547

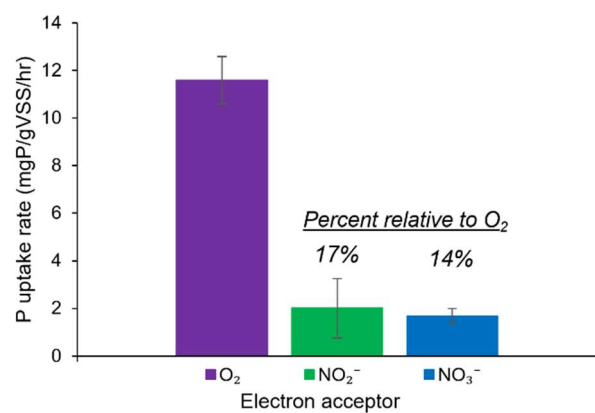

548

549 **Figure 5.** P uptake rates in the presence of O<sub>2</sub>, NO<sub>2</sub><sup>-</sup>, and NO<sub>3</sub><sup>-</sup> from *ex situ* batch tests.

550

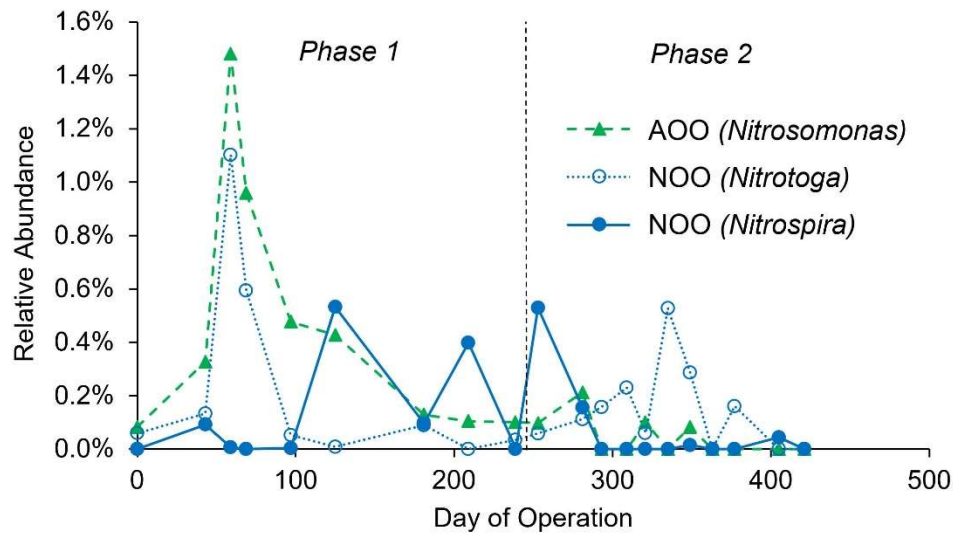

551

552 **Figure 6.** Relative AOO and NOO abundance based on 16S rRNA gene amplicon sequencing  
553 through the first 421 days of reactor operation. Day “0” represents the inoculum, which was  
554 sampled before reactor operation began.

555

556

557

## 558 7. References

559

- 560 1 Ll. Corominas, L. Rieger, I. Takács, G. Ekama, H. Hauduc, P. A. Vanrolleghem, A.  
561 Oehmen, K. V. Gernaey, M. C. M. van Loosdrecht and Y. Comeau, *Water Sci. Technol.*,  
562 2010, **61**, 841–857.
- 563 2 H. Gao, Y. D. Scherson and G. F. Wells, *Environ. Sci. Process. Impacts*, 2014, **16**, 1223.
- 564 3 C. Chan, A. Guisasola and J. A. Baeza, *Water Res.*, 2017, **118**, 217–226.
- 565 4 B. Ma, S. Wang, S. Zhang, X. Li, P. Bao and Y. Peng, *Bioresour. Technol.*, 2013, **139**,  
566 375–378.
- 567 5 Y. Yang, L. Zhang, H. Shao, S. Zhang, P. Gu and Y. Peng, *Front. Environ. Sci. Eng.*, ,  
568 DOI:10.1007/s11783-017-0911-0.
- 569 6 D. S. Lee, C. O. Jeon and J. M. Park, *Water Res.*, 2001, **35**, 3968–3976.
- 570 7 S. Tsuneda, T. Ohno, K. Soejima and A. Hirata, *Biochem. Eng. J.*, 2006, **27**, 191–196.
- 571 8 R. J. Zeng, R. Lemaire, Z. Yuan and J. Keller, *Biotechnol. Bioeng.*, 2003, **84**, 170–178.
- 572 9 W. Zeng, B. Li, X. Wang, X. Bai and Y. Peng, *Bioresour. Technol.*, 2014, **172**, 356–364.
- 573 10 J. A. Jimenez, G. Wise, G. Burger, W. Du and P. Dold, WEFTEC, New Orleans, LA, 2014.
- 574 11 Y. Cao, K. B. Hong, M. C. M. van Loosdrecht, G. T. Daigger, P. H. Yi, Y. L. Wah, C. S.  
575 Chye and Y. A. Ghani, *Water Sci. Technol.*, 2016, **74**, 48–56.
- 576 12 C. Hellinga, A. A. J. C. Schellen, J. W. Mulder, M. C. M. van Loosdrecht and J. J. Heijnen,  
577 *Water Sci. Technol.*, 1998, **37**, 135–142.
- 578 13 B. Ma, P. Bao, Y. Wei, G. Zhu, Z. Yuan and Y. Peng, *Sci. Rep.*, 2015, **5**, 13048.
- 579 14 E. M. Gilbert, S. Agrawal, F. Brunner, T. Schwartz, H. Horn and S. Lackner, *Environ. Sci.*  
580 *Technol.*, 2014, **48**, 2934–2941.
- 581 15 Y. Ma, C. Domingo-Félez, B. Gy. Plósz and B. F. Smets, *Environ. Sci. Technol.*, ,  
582 DOI:10.1021/acs.est.7b00463.
- 583 16 A. C. Anthonisen, R. C. Loehr, T. B. S. Prakasam and E. G. Srinath, *Water Pollut. Control*  
584 *Fed.*, 1976, **48**, 835–852.
- 585 17 D. Seuntjens, M. Van Tendeloo, I. Chatzigiannidou, J. M. Carvajal-Arroyo, S.  
586 Vandendriessche, S. E. Vlaeminck and N. Boon, *Environ. Sci. Technol.*, 2018, **52**, 8725–  
587 8732.
- 588 18 J. Desloover, H. De Clippeleir, P. Boeckx, G. Du Laing, J. Colsen, W. Verstraete and S. E.  
589 Vlaeminck, *Water Res.*, 2011, **45**, 2811–2821.
- 590 19 C. Domingo-Félez, A. G. Mutlu, M. M. Jensen and B. F. Smets, *Environ. Sci. Technol.*,  
591 2014, **48**, 8679–8687.
- 592 20 A. Joss, D. Salzgeber, J. Eugster, R. König, K. Rottermann, S. Burger, P. Fabijan, S.  
593 Leumann, J. Mohn and H. Siegrist, *Environ. Sci. Technol.*, 2009, **43**, 5301–5306.
- 594 21 M. J. Kampschreur, W. R. L. van der Star, H. A. Wielders, J. W. Mulder, M. S. M. Jetten  
595 and M. C. M. van Loosdrecht, *Water Res.*, 2008, **42**, 812–826.
- 596 22 M. Laurenzi, D. G. Weissbrodt, K. Villez, O. Robin, N. de Jonge, A. Rosenthal, G. Wells, J.  
597 L. Nielsen, E. Morgenroth and A. Joss, *Water Res.*, 2019, **154**, 104–116.
- 598 23 H. Melcer, *Methods for Wastewater Characterization in Activated Sludge Modelling*, IWA  
599 Publishing, 2004.
- 600 24 D. Mamais, D. Jenkins and P. Prrr, *Water Res.*, 1993, **27**, 195–197.
- 601 25 APHA, *Standard methods for the examination of water and wastewater*, American Public  
602 Health Association, Washington, D.C., 21st edn., 2005.

- 603 26 M. Laurenzi, P. Falås, O. Robin, A. Wick, D. G. Weissbrodt, J. L. Nielsen, T. A. Ternes, E.  
604 Morgenroth and A. Joss, *Water Res.*, DOI:10.1016/j.watres.2016.05.005.
- 605 27 P. Roots, Y. Wang, A. F. Rosenthal, J. S. Griffin, F. Sabba, M. Petrovich, F. Yang, J.  
606 Kozak, H. Zhang and G. F. Wells, *Water Res.*
- 607 28 P. S. Barker and P. L. Dold, *Water Environ. Res.*, 1997, **69**, 985–991.
- 608 29 J. S. Griffin and G. F. Wells, *ISME J.*, 2017, **11**, 500–511.
- 609 30 A. E. Parada, D. M. Needham and J. A. Fuhrman, *Environ. Microbiol.*, 2016, **18**, 1403–  
610 1414.
- 611 31 J.-H. Rotthauwe, K.-P. Witzel and W. Liesack, *Appl. Environ. Microbiol.*, 1997, **63**, 4704–  
612 4712.
- 613 32 H. Burgmann, S. Jenni, F. Vazquez and K. M. Udert, *Appl. Environ. Microbiol.*, 2011, **77**,  
614 5897–5907.
- 615 33 J. H. Ahn, S. Kim, H. Park, B. Rahm, K. Pagilla and K. Chandran, *Environ. Sci. Technol.*,  
616 2010, **44**, 4505–4511.
- 617 34 J. Foley, D. de Haas, Z. Yuan and P. Lant, *Water Res.*, 2010, **44**, 831–844.
- 618 35 Y.-C. Chung and M.-S. Chung, *Water Sci. Technol.*, 2000, **42**, 23–27.
- 619 36 Y. Law, L. Ye, Y. Pan and Z. Yuan, *Philos. Trans. R. Soc. B Biol. Sci.*, 2012, **367**, 1265–  
620 1277.
- 621 37 F. Sabba, A. Terada, G. Wells, B. F. Smets and R. Nerenberg, *Appl Microbiol Biotechnol*,  
622 2018, 36.
- 623 38 W. M. Lewis and D. P. Morris, *Trans. Am. Fish. Soc.*, 1986, **115**, 183–195.
- 624 39 P. Regmi, B. Holgate, M. W. Miller, H. Park, K. Chandran, B. Wett, S. Murthy and C. B.  
625 Bott, *Biotechnol. Bioeng.*, 2015, n/a-n/a.
- 626 40 M. Christensson, S. Ekström, A. Andersson Chan, E. Le Vaillant and R. Lemaire, *Water*  
627 *Sci. Technol. J. Int. Assoc. Water Pollut. Res.*, 2013, **67**, 2677–2684.
- 628 41 G. Carvalho, P. C. Lemos, A. Oehmen and M. A. M. Reis, *Water Res.*, 2007, **41**, 4383–  
629 4396.
- 630 42 R. J. Zeng, A. M. Saunders, Z. Yuan, L. L. Blackall and J. Keller, *Biotechnol. Bioeng.*,  
631 2003, **83**, 140–148.
- 632 43 P. Y. Camejo, B. O. Oyserman, K. D. McMahon and D. R. Noguera, *mSystems*, ,  
633 DOI:10.1128/mSystems.00193-18.
- 634 44 C. M. Sales and P. K. Lee, *Curr. Opin. Biotechnol.*, 2015, **33**, 260–267.
- 635 45 M. Pijuan, L. Ye and Z. Yuan, *Water Res.*, 2010, **44**, 6063–6072.
- 636 46 J. R. Rumble, CRC Handbook of Chemistry and Physics 99th Edition,  
637 [http://hbcponline.com/faces/documents/05\\_24/05\\_24\\_0003.xhtml](http://hbcponline.com/faces/documents/05_24/05_24_0003.xhtml), (accessed October 9,  
638 2018).
- 639 47 M. Stokholm-Bjerregaard, S. J. McIlroy, M. Nierychlo, S. M. Karst, M. Albertsen and P.  
640 H. Nielsen, *Front. Microbiol.*, , DOI:10.3389/fmicb.2017.00718.
- 641 48 N. A. Keene, S. R. Reusser, M. J. Scarborough, A. L. Grooms, M. Seib, J. Santo Domingo  
642 and D. R. Noguera, *Water Res.*, 2017, **121**, 72–85.
- 643 49 H. Daims, E. V. Lebedeva, P. Pjevac, P. Han, C. Herbold, M. Albertsen, N. Jehmlich, M.  
644 Palatinszky, J. Vierheilig, A. Bulaev, R. H. Kirkegaard, M. von Bergen, T. Rattei, B.  
645 Bendinger, P. H. Nielsen and M. Wagner, *Nature*, 2015, **528**, 504–509.
- 646 50 C. M. Fitzgerald, P. Camejo, J. Z. Oshlag and D. R. Noguera, *Water Res.*, 2015, **70**, 38–51.  
647
